# Supplementary material
Source: PubMed Central journal article supplement (PMC7529933)
Supplement: NIHMS1606135-supplement-Supplemental_Appendices.pdf [file NIHMS1606135-supplement-Supplemental_Appendices.pdf]

## Appendix 1.

In addition to the authors, other members of the *Eunice Kennedy Shriver* National Institute of Child Health and Human Development Maternal-Fetal Medicine Units Network are as follows:

*Stanford University, Stanford, CA* – C. Willson, D. Lyell, A. Girsen, R. Knapp

*Northwestern University, Chicago, IL* – A. Peaceman, B. Plunkett (NorthShore University), K.

Paycheck (NorthShore University), M. Dinsmoor (NorthShore University)

*University of Alabama at Birmingham, Birmingham, AL* – S. Harris, J. Sheppard, J. Biggio,

L. Harper, S. Longo (Ochsner), C. Servay (Ochsner)

*University of Utah Health Sciences Center, Salt Lake City, UT* – M. Varner, A. Sowles, K.

Coleman (Utah Valley Hospital), D. Atkinson (Utah Valley Hospital), J. Stratford (McKay-

Dee Hospital), S. Dellermann (McKay-Dee Hospital), C. Meadows (McKay-Dee Hospital), S.

Esplin (Intermountain Med Ctr), C. Martin (Intermountain Med Ctr), K. Peterson

(Intermountain Med Ctr), S. Stradling (LDS Hospital)

*Columbia University, New York, NY* – C. Gyamfi, S. Bousleiman, A. Perez-Delboy, M. Talucci,

V. Carmona, L. Plante (Drexel University), C. Tocci (Drexel University), B. Leopanto

(Drexel University), M. Hoffman (Christiana Care), L. Dill-Grant (Christiana Care), K.

Palomares (St. Peter's Univ. Hosp.), S. Otarola (St. Peter's Univ. Hosp.), D. Skupski (NYP

Queen), R. Chan (NYP Queens)

*Brown University, Providence, RI* – D. Allard, T. Gelsomino, J. Rousseau, L. Beati, J. Milano,

E. Werner

El-Sayed YY, Rice MM, Grobman WA, Reddy UM, Tita ATN, Silver RM, et al. Elective labor induction at 39 weeks compared with expectant management: factors associated with adverse outcomes in low-risk nulliparous women. *Obstet Gynecol* 2020;136.

The authors provided this information as a supplement to their article.

©2020 American College of Obstetricians and Gynecologists.

*University of Texas Medical Branch, Galveston, TX* – A. Salazar, M. Costantine, G. Chiossi, L. Pacheco, A. Saad, M. Munn, S. Jain, S. Clark

*University of North Carolina at Chapel Hill, Chapel Hill, NC* – K. Clark, K. Boggess, S. Timlin, K. Eichelberger (Greenville Memorial Hospital), A. Moore (Greenville Memorial Hospital), C. Beamon (WakeMed Health & Hospitals), H. Byers (WakeMed Health & Hospitals)

*UT Health- University of Texas Medical School at Houston--Children's Memorial Hermann Hospital, Houston, TX* – F. Ortiz, L. Garcia (Harris Health System, Lyndon B. Johnson Hospital), B. Sibai

*The Ohio State University, Columbus, OH* – A. Bartholomew, C. Buhimschi, M. Landon, F. Johnson, L. Webb, D. McKenna (Miami Valley Hospital), K. Fennig (Miami Valley Hospital), K. Snow (Miami Valley Hospital), M. Habli (Good Samaritan Hospital), M. McClellan (Good Samaritan Hospital), C. Lindeman (Good Samaritan Hospital)

*MetroHealth Medical Center-Case Western Reserve University, Cleveland, OH* – W. Dalton, D. Hackney (University Hospital Cleveland), H. Cozart, A. Mayle, B. Mercer

*University of Texas Southwestern Medical Center, Dallas, TX* – L. Moseley, J. Gerald, L. Fay-Randall, M. Garcia, A. Sias, J. Price

*University of Colorado, Denver, CO* – K. Hale, J. Phipers, K. Heyborne

*University of Pennsylvania, Philadelphia, PA* – J. Craig, S. Parry, H. Sehdev (Pennsylvania Hospital)

*Duke University, Durham, NC* – T. Bishop, J. Ferrara

*University of Pittsburgh, Pittsburgh, PA* – M. Bickus, S.. Caritis

El-Sayed YY, Rice MM, Grobman WA, Reddy UM, Tita ATN, Silver RM, et al. Elective labor induction at 39 weeks compared with expectant management: factors associated with adverse outcomes in low-risk nulliparous women. *Obstet Gynecol* 2020;136.

The authors provided this information as a supplement to their article.

©2020 American College of Obstetricians and Gynecologists.

*The George Washington University Biostatistics Center, Washington, DC – L. Doherty, J. de*

*Voest, V. Bhandaru*

*Eunice Kennedy Shriver National Institute of Child Health and Human Development, Bethesda,*

*MD – S. Tolivaisa, M. Miodovnik*

El-Sayed YY, Rice MM, Grobman WA, Reddy UM, Tita ATN, Silver RM, et al. Elective labor induction at 39 weeks compared with expectant management: factors associated with adverse outcomes in low-risk nulliparous women. *Obstet Gynecol* 2020;136.

The authors provided this information as a supplement to their article.

©2020 American College of Obstetricians and Gynecologists.

**Appendix 2. Maternal Characteristics of Those Included in the Analysis and Those Excluded Because They Were Not Delivered per Protocol**

| Characteristic                                            | Included<br>(n=5007) | Excluded*<br>(n=320) | P†     |
|-----------------------------------------------------------|----------------------|----------------------|--------|
| Age, years                                                | 24 (20-28)           | 24 (21-29)           | 0.17   |
| Age ≥ 35 years                                            | 215 (4.3)            | 15 (4.7)             | 0.74   |
| Race or ethnic group                                      |                      |                      | <0.001 |
| Black                                                     | 1156 (23.1)          | 64 (20.0)            |        |
| White                                                     | 2231 (44.6)          | 118 (36.9)           |        |
| Asian                                                     | 151 (3.0)            | 13 (4.1)             |        |
| Hispanic                                                  | 1341 (26.8)          | 122 (38.1)           |        |
| Other, unknown, or more than one race                     | 128 (2.6)            | 3 (0.9)              |        |
| Married or living with partner                            | 2983 (59.6)          | 194 (60.6)           | 0.71   |
| Employment status‡                                        |                      |                      | 0.07   |
| Not employed                                              | 2415 (48.4)          | 171 (53.4)           |        |
| Employed part time                                        | 573 (11.5)           | 25 (7.8)             |        |
| Employed full time                                        | 2005 (40.2)          | 124 (38.8)           |        |
| Private insurance‡                                        | 2262 (45.2)          | 132 (41.3)           | 0.17   |
| Body mass index at randomization, kg/m <sup>2</sup> ‡     | 30.5 (27.3-34.9)     | 30.6 (27.0-34.8)     | 0.99   |
| Body mass index at randomization ≥ 30 kg/m <sup>2</sup> ‡ | 2657 (53.3)          | 173 (54.2)           | 0.76   |
| Smoked cigarettes                                         | 384 (7.7)            | 20 (6.3)             | 0.35   |

El-Sayed YY, Rice MM, Grobman WA, Reddy UM, Tita ATN, Silver RM, et al. Elective labor induction at 39 weeks compared with expectant management: factors associated with adverse outcomes in low-risk nulliparous women. *Obstet Gynecol* 2020;136.

The authors provided this information as a supplement to their article.

©2020 American College of Obstetricians and Gynecologists.

|                                                                                                                                                                                                                                                                                           |             |            |      |
|-------------------------------------------------------------------------------------------------------------------------------------------------------------------------------------------------------------------------------------------------------------------------------------------|-------------|------------|------|
| Drank alcohol                                                                                                                                                                                                                                                                             | 196 (3.9)   | 13 (4.1)   | 0.89 |
| Previous pregnancy loss                                                                                                                                                                                                                                                                   | 1203 (24.0) | 75 (23.4)  | 0.81 |
| Conception assisted by ovulation induction, artificial insemination, or in vitro fertilization                                                                                                                                                                                            | 136 (2.7)   | 4 (1.3)    | 0.11 |
| Modified Bishop score at randomization‡                                                                                                                                                                                                                                                   |             |            | 0.25 |
| 0-2                                                                                                                                                                                                                                                                                       | 1568 (31.3) | 117 (36.6) |      |
| 3-4                                                                                                                                                                                                                                                                                       | 1725 (34.5) | 98 (30.6)  |      |
| 5-6                                                                                                                                                                                                                                                                                       | 1424 (28.5) | 88 (27.5)  |      |
| > 6                                                                                                                                                                                                                                                                                       | 289 (5.8)   | 17 (5.3)   |      |
| Randomized to labor induction                                                                                                                                                                                                                                                             | 2505 (50.0) | 181 (56.6) | 0.02 |
| <p>Data are median (interquartile range) or n (%).</p> <p>*Excluded because not delivered per protocol.</p> <p>†Based on chi square or Wilcoxon rank sum test.</p> <p>‡ Missing data: employment status (14); type of insurance (1); body mass index (27); modified Bishop score (1).</p> |             |            |      |

El-Sayed YY, Rice MM, Grobman WA, Reddy UM, Tita ATN, Silver RM, et al. Elective labor induction at 39 weeks compared with expectant management: factors associated with adverse outcomes in low-risk nulliparous women. *Obstet Gynecol* 2020;136.

The authors provided this information as a supplement to their article.

©2020 American College of Obstetricians and Gynecologists.
